# Supplementary material
Source: publisher figshare collection journal article supplement (https://karger.figshare.com/ndownloader/files/21808074)
Supplement: Supplementary file 1 [file 21808074]

**Supplementary Information**

***Statins directly regulate pituitary cell function and exert antitumor effects in pituitary tumors***

Mari C. Vázquez-Borrego1,2,3,4, Antonio C. Fuentes-Fayos1,2,3,4, Aura D. Herrera Martínez1,3,5, Eva Venegas-Moreno6, Fernando L-López1,2,3,4, Alessandro Fanciulli7, Paloma Moreno-Moreno1,3,5, María R. Alhambra-Expósito1,3,5, Ana Barrera-Martín1,3,5, Elena Dios6, Cristóbal Blanco-Acevedo1,3,8 Juan Solivera1,3,8, Riccarda Granata7, Rhonda D. Kineman9, Manuel D. Gahete1,2,3,4, Alfonso Soto-Moreno6, María A. Gálvez-Moreno1,3,5, Justo P. Castaño1,2,3,4, Raúl M. Luque1,2,3,4*.

1 Maimonides Institute of Biomedical Research of Cordoba (IMIBIC), 14004 Cordoba, Spain.

2 Department of Cell Biology, Physiology and Immunology, University of Cordoba, 14004 Cordoba, Spain.

3 Reina Sofia University Hospital (HURS), 14004 Cordoba, Spain.

4 CIBER Physiopathology of Obesity and Nutrition (CIBERobn), 14004 Cordoba, Spain.

5 Service of Endocrinology and Nutrition, IMIBIC, HURS, 14004 Cordoba, Spain.

6 Metabolism and Nutrition Unit, Hospital Universitario Virgen del Rocío, Instituto de Biomedicina de Sevilla (IBIS), 41013 Sevilla, Spain.

7 Division of Endocrinology, Diabetes and Metabolism, Department of Medical Sciences, University of Turin and Città Della Salute e Della Scienza Hopital, Turin, 10126, Italy.

8 Service of Neurosurgery, HURS, 14004 Cordoba, Spain

9 Research and Developments Division, Jesse Brown Veterans Affairs Medical Center; Section of Endocrinology, Diabetes, and Metabolism, Department of Medicine, University of Illinois at Chicago, Chicago, Illinois, USA.

**Supplementary Figure 1:** Direct effect of SSAs (octreotide and pasireotide; 100 nM) and simvastatin (10 μM) on cell viability in ACTHomas (A: n=2 SSA-resistant tumors; B: n=1 SSA-responsive tumor) and in GHomas (C; n=4, all SSA-responsive tumor), measured by Alamar-blue reduction. Data are expressed as percent of vehicle-treated controls (set at 100%) within experiment. Statistical differences were assessed by one-way ANOVA followed by Dunnett´s test for multiple comparisons (according to normality evaluated by Kolmogorov-Smirnov test). Values represent the mean ± SEM. Asterisks (** p<0.01) indicate statistically significant differences.
